# Supplementary material
Source: HighWire-hosted journal article supplement (http://www.cmaj.ca/highwire/filestream/69798/field_highwire_adjunct_files/2/170892-res-3-at.pdf)
Supplement: 170892-res-3-at.pdf [file 170892-res-3-at.pdf]

**Appendix 3 (as supplied by the authors): Effect modification by gender, home care nursing visits**

| <b>Patient Group</b> | <b>Outcome</b>         | <b>Gender</b> | <b>OR (95% CI)</b> | <b>p-value<sup>1</sup></b> |
|----------------------|------------------------|---------------|--------------------|----------------------------|
| Long Stay            | ED Visit               | Female        | 1.21 (1.03-1.43)   | 0.2                        |
|                      |                        | Male          | 1.43 (1.21-1.69)   |                            |
|                      | ED Visit, Admission    | Female        | 1.05 (0.82-1.34)   | 0.4                        |
|                      |                        | Male          | 1.23 (0.96-1.58)   |                            |
|                      | ED Visit, No Admission | Female        | 1.43 (1.15-1.79)   | 0.6                        |
|                      |                        | Male          | 1.57 (1.27-1.95)   |                            |
|                      | ED Visit, CTAS 1-3     | Female        | 1.19 (1.00-1.42)   | 0.2                        |
|                      |                        | Male          | 1.35 (1.12-1.61)   |                            |
|                      | ED Visit, CTAS 4-5     | Female        | 1.20 (0.78-1.85)   | 0.04                       |
|                      |                        | Male          | 2.28 (1.47-3.52)   |                            |
| Short Stay           | ED Visit               | Female        | 1.13 (0.93-1.36)   | 0.3                        |
|                      |                        | Male          | 1.31 (1.09-1.58)   |                            |
|                      | ED Visit, Admission    | Female        | 0.96 (0.72-1.15)   | 0.4                        |
|                      |                        | Male          | 1.17 (0.84-0.17)   |                            |
|                      | ED Visit, No Admission | Female        | 1.23 (0.98-1.55)   | 0.5                        |
|                      |                        | Male          | 1.36 (1.09-1.70)   |                            |
|                      | ED Visit, CTAS 1-3     | Female        | 1.19 (1.00-1.42)   | 0.4                        |
|                      |                        | Male          | 1.35 (1.12-1.61)   |                            |
|                      | ED Visit, CTAS 4-5     | Female        | 1.28 (0.84-1.96)   | 0.8                        |
|                      |                        | Male          | 1.17 (0.79-1.73)   |                            |

<sup>1</sup> p-value of interaction term in conditional logistic regression model
